# Supplementary material
Source: ML conference proceedings conference paper supplement (https://openreview.net/forum?id=1cURNMriee)
Supplement: supplementary_material [file 20862_Supplementary Material.pdf › 20862_Supplementary Material.pdf]

## A Implementation Details for Streaming Models

We describe the hyperparameter details of StreamFlow for streaming models at Table 6. For EnCodec Token, we successfully train the model with small segment size. However, we found that extracting Mimi tokens with small segment size significantly decrease the performance because Mimi compressed waveform signal of 24,000 Hz into 12.5 Hz. In this regard, we pre-trained the StreamFlow-Mimi with larger segment size. Furthermore, we utilize small size of audio/token drop for Mimi model because we only utilized two-step generation. Due to the limited GPU resource, we only trained the StreamFlow-Mimi for 0.15M steps. However, our model shows much better performance than Mimi.

Table 6: Hyperparameters of StreamFlow for streaming EnCodec token reconstruction.

| Module                         | Hyperparameter      | SteamFlow-T        | SteamFlow-S        | SteamFlow-B        | SteamFlow-Mimi     |
|--------------------------------|---------------------|--------------------|--------------------|--------------------|--------------------|
| Time                           | Time Embedding      | 256                | 512                | 1024               | 1024               |
|                                | Linear1             | [256, 1024]        | [512, 2048]        | [1024, 4096]       | [1024, 4096]       |
|                                | Activation          | SiLU               | SiLU               | SiLU               | SiLU               |
|                                | Linear2             | [1024, 256]        | [2048, 512]        | [4096, 1024]       | [4096, 1024]       |
| Condition                      | Token               | EnCodec            | EnCodec            | EnCodec            | Mimi               |
|                                | Token Hz            | 75 Hz              | 75 Hz              | 75 Hz              | 12.5Hz             |
|                                | Frame per token     | 320                | 320                | 320                | 1920               |
|                                | Token dim           | 128                | 128                | 128                | 512                |
|                                | Linear1             | [128, 256]         | [128, 512]         | [128, 1024]        | [512, 1024]        |
|                                | Activation1         | GELU               | GELU               | GELU               | GELU               |
|                                | Linear2             | [256, 256]         | [512, 512]         | [1024, 1024]       | [1024, 1024]       |
|                                | Activation2         | GELU               | GELU               | GELU               | GELU               |
|                                | Upsampling          | Repeating 2        | Repeating 2        | Repeating 2        | Repeating 12       |
| Input&Prompt<br>Linear Reshape | $h$                 | 160                | 160                | 160                | 160                |
|                                | Linear1 (No Bias)   | [160, 512]         | [160,1024]         | [160, 2048]        | [160, 2048]        |
|                                | Linear2             | [512, 256]         | [1024,512]         | [2048, 1024]       | [2048, 1024]       |
| Output<br>Linear Reshape       | Linear1             | [256, 512]         | [512,1024,]        | [1024,2048]        | [1024,2048]        |
|                                | Linear2 (No Bias)   | [512,160]          | [1024,160]         | [2048,160]         | [2048,160]         |
|                                | $h$                 | 160                | 160                | 160                | 160                |
| Scale-DiT                      | Input Dim.          | 256                | 512                | 1024               | 1024               |
|                                | Hidden Dim.         | 1024               | 2048               | 4096               | 4096               |
|                                | Layer               | 8                  | 8                  | 8                  | 8                  |
|                                | Head                | 4                  | 8                  | 16                 | 16                 |
|                                | Stream Token        | 8                  | 8                  | 8                  | 2                  |
|                                | Prompt Token        | 24                 | 24                 | 24                 | 6                  |
| Pre-train                      | Training Step       | 1M                 | 1M                 | 1M                 | 0.5M               |
|                                | Learning Rate       | $2 \times 10^{-4}$ | $2 \times 10^{-4}$ | $2 \times 10^{-4}$ | $2 \times 10^{-4}$ |
|                                | Learning Scheduling | -                  | -                  | -                  | -                  |
|                                | Batch Size          | 512                | 512                | 512                | 128                |
|                                | GPUs                | 4                  | 4                  | 4                  | 4                  |
|                                | Noise Scale         | 0.25               | 0.25               | 0.25               | 0.25               |
|                                | Segment Size        | 10240              | 10240              | 10240              | 48000              |
|                                | Audio Drop          | 0.3                | 0.3                | 0.3                | 0.3                |
|                                | Token Drop          | 0.2                | 0.2                | 0.2                | 0.2                |
| Fine-tuning                    | Training Step       | 0.25M              | 0.25M              | 0.25M              | 0.15M              |
|                                | Learning Rate       | $2 \times 10^{-5}$ | $2 \times 10^{-5}$ | $2 \times 10^{-5}$ | $2 \times 10^{-5}$ |
|                                | Learning Scheduling | -                  | -                  | -                  | -                  |
|                                | Batch Size          | 64                 | 64                 | 64                 | 64                 |
|                                | GPUs                | 4                  | 4                  | 4                  | 4                  |
|                                | Noise Scale         | 0.25               | 0.25               | 0.25               | 0.25               |
|                                | Segment Size        | 20480              | 20480              | 20480              | 30720              |
|                                | Audio Drop          | 0.3                | 0.3                | 0.3                | 0.1                |
|                                | Token Drop          | 0.2                | 0.2                | 0.2                | 0.1                |

## B Implementation Details for Parallel Models

We describe the hyperparameter details of StreamFlow for parallel models at Table 7. We replace the linear-reshape transformation with STFT and iSTFT. We do not utilize any iSTFT head which was used in Vocos. We can not train the model with iSTFT head of Vocos during pre-training. We directly project components for iSTFT.

Table 7: Hyperparameters of StreamFlow for parallel EnCodec token reconstruction.

| Module                         | Hyperparameter      | SteamFlow + iSTFT  | SteamFlow          |
|--------------------------------|---------------------|--------------------|--------------------|
| Time                           | Time Embedding      | 1024               | 1024               |
|                                | Linear1             | [1024, 4096]       | [1024, 4096]       |
|                                | Activation          | SiLU               | SiLU               |
|                                | Linear2             | [4096, 1024]       | [4096, 1024]       |
| Condition                      | Token               | EnCodec            | EnCodec            |
|                                | Token Hz            | 75 Hz              | 75 Hz              |
|                                | Frame per token     | 320                | 320                |
|                                | Token dim           | 128                | 128                |
|                                | Linear1             | [128, 1024]        | [512, 1024]        |
|                                | Activation1         | GELU               | GELU               |
|                                | Linear2             | [1024, 1024]       | [1024, 1024]       |
|                                | Activation2         | GELU               | GELU               |
|                                | Upsampling          | Repeating 2        | Repeating 2        |
| Input&Prompt<br>Linear Reshape | $h$                 | -                  | 160                |
|                                | Linear1 (No Bias)   | -                  | [160, 2048]        |
|                                | Linear2             | -                  | [2048, 1024]       |
| Output<br>Linear Reshape       | Linear1             | -                  | [1024, 2048]       |
|                                | Linear2 (No Bias)   | -                  | [2048, 160]        |
|                                | $h$                 | -                  | 160                |
| STFT/iSTFT                     | Hop/Window/FFT      | 160/640/640        | -                  |
| Scale-DiT                      | Input Dim.          | 1024               | 1024               |
|                                | Hidden Dim.         | 4096               | 4096               |
|                                | Layer               | 8                  | 8                  |
|                                | Head                | 16                 | 16                 |
| Pre-train                      | Training Step       | 1M                 | 1M                 |
|                                | Learning Rate       | $2 \times 10^{-4}$ | $2 \times 10^{-4}$ |
|                                | Learning Scheduling | -                  | -                  |
|                                | Batch Size          | 128                | 128                |
|                                | GPUs                | 4                  | 4                  |
|                                | Noise Scale         | 0.25               | 0.25               |
|                                | Segment Size        | 48000              | 48000              |
|                                | Audio Drop          | 0.3                | 0.3                |
|                                | Token Drop          | 0.2                | 0.2                |
| Fine-tuning                    | Training Step       | 0.25M              | 0.25M              |
|                                | Learning Rate       | $2 \times 10^{-5}$ | $2 \times 10^{-5}$ |
|                                | Learning Scheduling | -                  | -                  |
|                                | Batch Size          | 32                 | 32                 |
|                                | GPUs                | 4                  | 4                  |
|                                | Noise Scale         | 0.25               | 0.25               |
|                                | Segment Size        | 48000              | 48000              |
|                                | Audio Drop          | 0.3                | 0.3                |
|                                | Token Drop          | 0.2                | 0.2                |

## C Additional Experiments on Pre-trained StreamFlow

Table 8 provides additional objective evaluation results of the pre-trained StreamFlow on the LibriTTS-dev dataset without adversarial fine-tuning. We evaluate both non-streaming with different sampling steps and classifier-free guidance values. Notably, comparable performance to the 16-step setting is achieved even with only 4 sampling steps, demonstrating the efficiency in both offline and streaming scenarios.

Table 8: Objective Evaluation for the pre-trained StreamFlow without adversarial fine-tuning on the LibriTTS-dev subsets.

| Model                   | Sampling Steps | CFG | M-STFT ↓ | PESQ ↑ | Period. ↓ | V/UV ↑ | Pitch ↓ | UTMOS ↑ |
|-------------------------|----------------|-----|----------|--------|-----------|--------|---------|---------|
| EnCodec                 | 1              | -   | 1.163    | 2.771  | 0.113     | 0.941  | 32.147  | 2.969   |
| Non-streaming (offline) |                |     |          |        |           |        |         |         |
| StreamFlow + iSTFT      | 16             | 1   | 1.301    | 3.094  | 0.087     | 0.953  | 28.635  | 3.450   |
| StreamFlow + iSTFT      | 16             | 0.5 | 1.311    | 3.143  | 0.085     | 0.954  | 26.535  | 3.539   |
| StreamFlow + iSTFT      | 16             | 0   | 1.399    | 2.827  | 0.094     | 0.950  | 27.020  | 3.482   |
| StreamFlow + iSTFT      | 4              | 1   | 1.558    | 2.617  | 0.092     | 0.950  | 26.674  | 3.238   |
| StreamFlow + iSTFT      | 4              | 0.5 | 1.561    | 2.668  | 0.089     | 0.952  | 27.905  | 3.339   |
| StreamFlow + iSTFT      | 4              | 0   | 1.649    | 2.450  | 0.094     | 0.950  | 27.940  | 3.320   |
| Streaming (online)      |                |     |          |        |           |        |         |         |
| StreamFlow              | 16             | 1   | 1.343    | 2.719  | 0.097     | 0.949  | 22.096  | 3.147   |
| StreamFlow              | 16             | 0.5 | 1.341    | 2.790  | 0.093     | 0.952  | 20.328  | 3.224   |
| StreamFlow              | 16             | 0   | 1.388    | 2.669  | 0.101     | 0.950  | 21.099  | 3.178   |
| StreamFlow              | 4              | 1   | 1.509    | 2.479  | 0.101     | 0.946  | 20.956  | 3.012   |
| StreamFlow              | 4              | 0.5 | 1.504    | 2.607  | 0.094     | 0.952  | 17.812  | 3.131   |
| StreamFlow              | 4              | 0   | 1.570    | 2.557  | 0.095     | 0.952  | 18.697  | 3.149   |

## D Implementation Details for Baselines

**EnCodec** We utilize an official implementation of EnCodec [8], which is the popular neural audio codec using RVQ and adversarial training.<sup>3</sup> They utilize causal convolutional layer for streaming application, and train the model with 32 quantizer of RVQ. However, most application utilized eight quantizer as target tokens so we train the model with eight tokens to reconstruct the waveform signal.

**Vocos** We utilize an official implementation of Vocos [43], which is an iSTFT-based waveform generation model with adversarial training.<sup>4</sup> They utilize an EnCodec as an input representation to reconstruct the waveform signal. We also generate the waveform signal by chunk-wise generation using Vocos to compare the streaming generation performance. For a fair comparison, we utilize the same previous and delayed tokens for chunk-wise generation for robust generation of Vocos.

**MBD** We utilize an official implementation of Multi-band Diffusion (MBD) [42] as a strong baseline for EnCodec token reconstruction.<sup>5</sup> MBD consists of four models for each band, and has large-scale parameters of 411M. Then, they utilize 10 sampling steps for each band so it takes a lot of time to generate the waveform signal even with parallel generation.

**RFWave** We utilize an official implementation of RFWave [29], which a strong baseline using conditional flow matching for multi-band parallel generation.<sup>6</sup> We utilize 20 sampling steps for better performance and CFG of 2 which is suggested by official implementation.

**Mimi** We utilize an official implementation of Mimi<sup>7</sup> from Moshi [6]. They utilize causal convolutional layer for streaming generation, and train the model with 32 quantizer of RVQ and compressed high-resolution waveform signal of 24,000 Hz into 12.5 Hz for efficient speech language models. Moshi only utilizes eight quantizer of RVQ for target tokens by delayed prediction so we also train the model with eight tokens.

---

<sup>3</sup><https://github.com/facebookresearch/encodec>

<sup>4</sup><https://github.com/gemelo-ai/vocos>

<sup>5</sup><https://github.com/facebookresearch/audiocraft>

<sup>6</sup><https://github.com/bfs18/rfwave>

<sup>7</sup><https://github.com/kyutai-labs/moshi>

## E Societal Negative Impact

Although our method and model do not directly contribute to malicious use or ethical concerns, they can be misused when combined with text-to-speech or voice conversion models to deceive people. Therefore, it is crucial to explore fake audio detection and voice phishing detection models alongside our research. In the future, we aim to develop speech language models capable of identifying fake audio based on its content.

## F Evaluation Details

**M-STFT** We employed the multi-resolution Short-Time Fourier Transform (M-STFT) distance implemented in the open-source Auraloss [44].<sup>8</sup> Originally proposed in Parallel WaveGAN [50], the M-STFT quantifies the distances between ground-truth and generated audio samples across multiple STFT resolutions, thereby capturing both fine and coarse spectral details.

**PESQ** For evaluating reproduction quality, we utilized the wide-band (WB) Perceptual Evaluation of Speech Quality (PESQ) metric<sup>9</sup>. The audio signals were downsampled to a sampling rate of 16,000 Hz before calculating the PESQ scores to ensure consistency with standard evaluation protocols. Furthermore, we normalize the downsampled waveform signal to avoid overflow.

**Periodicity, V/UV F1, and Pitch** Following the observations of CarGAN [32] regarding the perceptual degradation caused by periodicity artifacts, we measured periodicity errors using the Periodicity Root Mean Square Error (RMSE)<sup>10</sup>. Additionally, we evaluated the Voice/Unvoice (V/UV) classification performance using the F1 score to assess the accuracy of voiced and unvoiced regions in the generated audio. Also, we calculated pitch errors using the pitch Root Mean Square Error (RMSQ). All metrics utilize pitch predicted by CREPE [16]. We used the pytorch implementation of CREPE.<sup>11</sup>

**UTMOS** To assess the naturalness of the generated samples, we utilized the open-source Mean Opinion Score (MOS) prediction model, UTMOS [41].<sup>12</sup> UTMOS has demonstrated consistent MOS prediction performance on neutral English speech datasets, providing a reliable measure of the perceived naturalness of the synthesized audio without reference samples.

---

<sup>8</sup><https://github.com/csteinmetz1/auraloss>

<sup>9</sup><https://github.com/ludlows/PESQ>

<sup>10</sup><https://github.com/descriptinc/cargan>

<sup>11</sup><https://github.com/maxrmorrison/torchcrepe>

<sup>12</sup><https://github.com/tarepan/SpeechMOS>

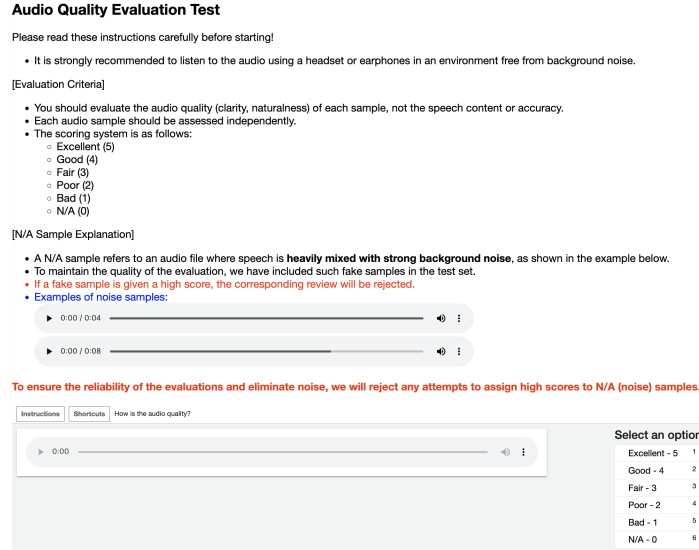

Figure 5: Details of the MOS evaluation interface provided to crowdsourcing participants

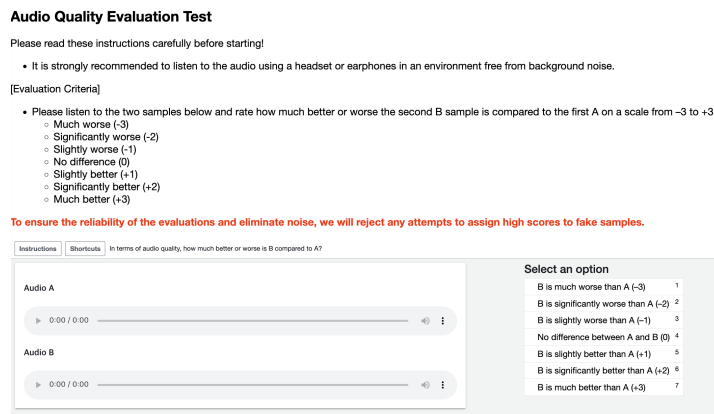

Figure 6: Details of the CMOS evaluation interface provided to crowdsourcing participants

## G Crowdsourcing Details

We conducted Mean Opinion Score (MOS) evaluations using a 5-point scale to assess the quality of speech. The perceptual quality of each model was evaluated through a crowdsourced listening test using Amazon Mechanical Turk (MTurk)<sup>13</sup>. A total of 20 native English speakers from the United States participated, each rating 300 samples per model on a scale from 1 to 5. We paid \$180 for each MOS experiment. To ensure the reliability of responses, we established strict participant eligibility criteria: only individuals with a prior task approval rate of at least 50% and a minimum of 100 approved HITs were permitted to take part in this evaluation. Additionally, we included Gaussian noise fake samples as control samples to enhance evaluation robustness, and we give the instruction which noise samples should be assigned as N/A sample (0 point). Listener responses were excluded from the final analysis if they met either of the following conditions: (1) assigning a score over 1 to the noise augmented samples, or (2) spending less than half the duration of an audio sample on the evaluation. These measures were implemented to filter out inattentive participants and maintain the integrity of the collected ratings. The user interface used for the evaluation is illustrated in Figure 5 and Figure 6.

<sup>13</sup><https://www.mturk.com/>

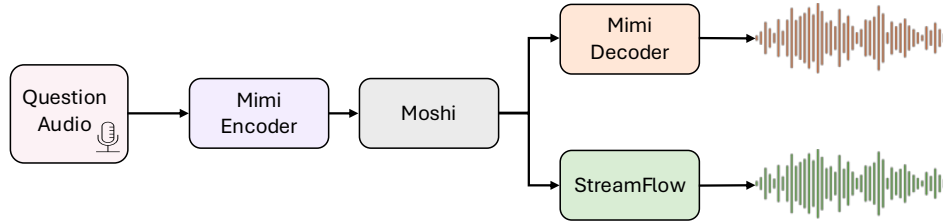

Figure 7: Inference pipeline comparing the Mimi decoder and the proposed StreamFlow, given identical Moshi output.

Table 9: Comparison of real-time decoding performance for full duplex spoken dialogue system, Moshi using the Mimi decoder and the proposed StreamFlow

| Method                     | CER ↓       | WER ↓       | UTMOS ↑      |
|----------------------------|-------------|-------------|--------------|
| Moshi w/ Mimi decoder      | 7.59        | 9.89        | 3.610        |
| Moshi w/ StreamFlow (Ours) | <b>7.19</b> | <b>9.82</b> | <b>3.847</b> |

## H Replacing Mimi with StreamFlow in a Full-duplex Streaming Model

We replaced the original Mimi decoder in Moshi with StreamFlow, successfully integrating it into Moshi’s fully-duplex streaming speech language model. For this integration, we utilized the official Moshi code<sup>14</sup>, and conducted experiments using question audio from HeySQuAD [48]<sup>15</sup> dataset as input. We upsampled the dataset, originally at 16 kHz sampling rate, to 24 kHz using Librosa and used it as input to Moshi. The outputs of the Moshi were kept identical across all conditions, allowing for a controlled comparison between the original Mimi decoder and our streaming StreamFlow. We evaluated both speech quality and speech intelligibility, using UTMOS, CER, and WER respectively as metrics. As shown in Table 9, our proposed StreamFlow consistently outperformed the Mimi decoder.

As shown in Figure 7, the pipeline of [Question Audio → Mimi Encoder → LLM → Selectable Decoder] demonstrates that improvements at the decoder stage can lead to substantial gains in speech generation quality. These experiments support the effectiveness of the proposed decoder in streaming-based speech generation scenarios and highlight its practical potential as a viable alternative to the original architecture.

<sup>14</sup>[https://github.com/kyutai-labs/moshi/blob/main/moshi/moshi/run\\_inference.py](https://github.com/kyutai-labs/moshi/blob/main/moshi/moshi/run_inference.py)

<sup>15</sup>[https://huggingface.co/datasets/yijingwu/HeySQuAD\\_human](https://huggingface.co/datasets/yijingwu/HeySQuAD_human)
